# Supplementary material for: Top 10 Tips for Responding to Reviewer and Editor Comments
Source: Oxford University Press journal article supplement (doi:10.1373/clinchem.2011.162388), 2011-02-01
Supplement: apr11_guide_to_sci_writing_esp_cxd.pdf [file apr11_guide_to_sci_writing_esp_cxd.pdf]

## Principales 10 Consejos Para Responder a los Comentarios del Editor y del Revisor

Thomas M. Annesley\*

Nos guste o no, muchos aspectos de nuestras vidas están involucrados con un proceso de revisión. En el colegio, sus profesores son revisores que evaluaron y graduaron su trabajo. Cuando usted solicita un préstamo, el banco usa tasadores y contadores para revisar su aplicación. Cuando un senador de E. U. escribe una nueva propuesta de legislación, hay otros muchos revisores que querrán cambiar el documento. Cuando una compañía quiere concursar por una patente, un ejército de abogados revisa la aplicación para encontrar alguna razón para declinar la petición.

Así que no nos debería de sorprender a cualquiera que quiera presentar un escrito científico para la publicación que el editor y muchos revisores siempre van a encontrar problemas o querrán ver cambios en el escrito. Esto es una parte normal del camino a la publicación. Usted no puede controlar que es lo que los revisores dicen pero, puede controlar cómo responder a sus comentarios. Así que aquí están mis 10 consejos principales para ayudarlo a navegar a través del proceso de respuesta.

### 1. Enójate. Después Supéralo

Es raro el escrito científico que es aceptado sin ninguna necesidad de revisión. Así que, como autor, usted debería esperar que los artículos presentados, si logran pasar el primer ciclo de revisión, requerirán alguna especie de modificación para satisfacer las críticas de los revisores. Es trabajo del editor y el revisor por igual asegurarse, a favor de la revista, que su escrito sea científicamente firme, factual, claro, completo y original. Para hacerlo, estos individuos deben apuntar en ocasiones, lo que está mal en su escrito. Y para usted como autor, eso debe doler.

Cuando usted ve las críticas que los revisores tienen sobre su escrito, vaya y enójese. Vaya y ventile su frustración con un colega. Luego supéralo antes de que tome alguna decisión futura para revisar su escrito y

responda a los revisores. Una decisión pobre en este momento produce un resultado pobre. Responder a los comentarios del revisor de forma argumentativa usualmente solo polarizará la opinión de los editores y revisores en su contra.

### 2. Considere lo que dice Realmente la Carta de Decisión del Editor

En las cartas de no-aceptación, los editores normalmente mandan un mensaje sobre qué tan interesados están en revisar este trabajo otra vez (vea el cuadro de Ejemplos). Si el editor ha decidido rechazar su escrito, como el primer ejemplo muestra, lo mejor es solo aceptar la decisión y considerar otra revista.

Algunas cartas de rechazo (Ejemplo 2) ofrecen una oportunidad de reenviar. Usted sigue teniendo el pie en la puerta, pero necesita considerar cuidadosamente si hay una oportunidad real de que usted pueda mejorar el escrito para la satisfacción de los revisores. Después de encontrar numerosas deficiencias, los revisores a veces se detienen para dar comentarios porque sus recomendaciones son claras al tiempo en el que ellos son llevados a través del escrito. Si usted decide reenviar, es posible que: 1) los revisores tengan ya la vista envenenada del trabajo y 2) que usted reciba críticas adicionales de su trabajo cuando los revisores miren las otras partes del escrito y no lean cuidadosamente durante la primera ronda de revisiones.

El tercer ejemplo es también una carta de “revise y reenvíe”, pero ésta le dice que su escrito debería ser aceptable después de que usted haya respondido satisfactoriamente a los comentarios de los revisores. En este caso está en las mejores condiciones para mejorar el escrito y mandarlo de vuelta con un retraso mínimo.

### 3. Espere y Seleccione sus Pensamientos

Después de que usted haya leído la carta de decisión del editor y vea los comentarios de los revisores, tome al menos un día para permitirse a usted mismo procesar lo que ambos han dicho. Después tome una nueva mirada a los comentarios para determinar lo que los revisores quieren ver en el artículo revisado. Usted puede desarrollar un plan de juego al categorizar los comentarios del revisor, como a continuación: 1) peticiones para clarificación del texto existente, adición del texto

University of Michigan Health System, Ann Arbor, MI.

\* Dirigir correspondencia de este autor a: University of Michigan Health System, Room UH2G332, 1500 East Medical Center Dr., Ann Arbor, MI 48109-5054. E-mail [annesley@umich.edu](mailto:annesley@umich.edu).

Recibido para la publicación el 15 de Enero del 2011. Aceptado para la publicación el 20 de Enero del 2011.

## Ejemplos de Cartas de Decisión

Ejemplo 1. Rechazo, no reenvíe.

Su escrito ha sido examinado por 2 revisores expertos. Desafortunadamente, nosotros debemos declinar este manuscrito para la publicación. Las razones para esta decisión se indican en los comentarios de los revisores.

Ejemplo 2. Declinado por ahora, posible aceptación futura.

Su escrito ha sido examinado por 2 revisores expertos. Por las razones que se explican en los comentarios, no podemos aceptar este escrito para publicación en *Clinical Chemistry*. Podemos considerar una versión revisada que tome estas críticas en cuenta sin embargo, no podemos ofrecerle la seguridad de que al presentar un manuscrito revisado vaya a obtener la aceptación.

Ejemplo 3. Declinado por ahora, aceptación futura bastante probable.

Su escrito ha sido examinado por 2 revisores expertos. Como usted podrá ver en nuestros comentarios, cada revisor encuentra mérito en el trabajo pero hacen sugerencias constructivas. Por favor considere las sugerencias cuidadosamente, como los cambios que vaya a producir un artículo que le sirva mejor a usted y a sus lectores.

al llenar un hueco en el documento, o detalles experimentales adicionales; 2) peticiones por reanalizar, reexpresar, o reinterpretar datos existentes; 3) peticiones de experimentos adicionales o pruebas recientes del concepto; y 4) peticiones que usted simplemente no puede encontrar. Viendo el espectro de lo que usted necesita para cumplir con la mejora del documento que lo ayude a tener fuentes para hacerlo o necesite ajustar una consulta con un estadista profesional. Si los experimentos adicionales no necesitan ser realizados, comience con los protocolos de diseño experimental y póngalos en marcha. Si hay peticiones del revisor que usted no pueda encontrar, aquí también necesita poner en claro sus pensamientos. Usted necesita satisfacer al revisor de alguna manera, así que comience a desarrollar una explicación lógica para cómo o por qué el estudio no se ve afectado por una falla al incluir lo que el revisor solicitó.

#### **4. Incluso si el Revisor está Equivocado, esto no Significa que Usted esté en lo Correcto**

A veces los revisores olvidan algo y luego preguntan sobre ello en los comentarios. A veces el revisor no es un experto en todo lo que usted presente en el documento y juzga mal la importancia de algo que ellos han pedido que sea removido. A veces el revisor malinterpreta un resultado. A veces el revisor no está entendiendo completamente su mensaje y después lo pregunta. En otras palabras, los revisores pueden equivocarse.

Pero incluso si un revisor parece estar equivocado, eso no significa que usted esté en lo correcto. Usted, el

autor, puede ser la fuente del comentario malinterpretado del revisor. Si el revisor está confundido o malinterpreta algo en el documento, ellos pueden haber identificado sin intención alguna algo que usted no explicó con la claridad apropiada, olvidando incluir, o fallado en el énfasis necesario. Así que primero vea que puede usted hacer para mejorar el documento y satisfacer al revisor, no explique al revisor cómo él o ella están mal.

#### **5. Escoja Sabiamente sus Batallas**

Si su escrito científico es representativo, los revisores le solicitarán hacer más de una modificación. Algunos cambios que usted podrá estar de acuerdo valen la pena, algo que usted puede pensar que es irrelevante, y algo en lo que puede no estar de acuerdo. Incluso si usted no está completamente de acuerdo con los revisores en algunos puntos, necesita escoger sus batallas sabiamente. Si un cambio a una oración o párrafo es solicitado por el revisor y no afecta el significado pretendido, haga lo mejor para hacer el cambio. Esto no dolerá y manda el mensaje de que tomó sus sugerencias en serio; de cualquier modo, si usted cree que un cambio solicitado va a afectar negativamente el documento, continúe y muestre que no está de acuerdo respetuosamente. Es su nombre el que está en la página del título. Pero no responda declarando que el revisor está equivocado sin permitir al revisor, de cualquier manera posible, salvar la cara. Explique al revisor en dónde pudo haber malinterpretado la sección y que usted quiere quedarse con el texto intacto. Usted puede

encontrar, sin embargo, que tal como explicó la razón desea que el texto permanezca como esta, alguna parte de la redacción y la lógica que usted use para solicitarlo al revisor puede ser valiosa al agregar al párrafo en cuestión algo que ayude al lector a entender mejor el documento.

#### **6. No Ponga a Un Revisor en Contra de Otro**

Uno de los argumentos que usted nunca debe usar cuando se responde a los revisores es que sólo un revisor está en desacuerdo con un aspecto del documento mientras que el otro revisor no veía nada malo en ello. Los revisores son a menudo seleccionados debido a que tienen diferentes áreas de especialización y verán en el documento desde dos puntos de vista diferentes. Este enfoque ayuda a que el editor logre el objetivo de evaluar a fondo el documento completo. Por lo tanto, no consideran que la ausencia de una crítica sea igual como un acuerdo tácito con sus declaraciones. Responda a cada revisor, como si la revisión fuera la única que ha recibido.

En algunas situaciones los revisores harán recomendaciones diametralmente opuestas. Por ejemplo, un revisor puede sugerir la adición de más información para una figura, mientras que el segundo revisor puede sugerir que la cifra puede ser removida del documento. En estas situaciones, debe decidir qué propuesta mejorará el documento, sin embargo, no ignore la sugerencia al usar el argumento de que los revisores no pudieron ponerse de acuerdo. Proporcione una explicación lógica para los dos revisores de por qué usted cree que una de las sugerencias sería más eficaz en la mejora del documento.

#### **7. Sea Agradecido con el Tiempo de los Revisores y el Editor**

Los revisores ofrecen voluntariamente su tiempo cuando están de acuerdo para evaluar un trabajo científico. Si bien los comentarios a veces pueden parecer duros, la mayoría de los revisores son también autores y tratan de señalar las formas de mejorar el documento. Por lo tanto, agradezca por su tiempo, así como el tiempo del editor. Hágalo también cuando reenvíe el documento.

Sea cortés y atento en todas sus respuestas para los comentarios que recibió. Si un revisor lo felicita acerca de algún aspecto del documento, agradezca a la persona. Si el revisor hizo una buena observación que usted no había considerado, agradezca al revisor, incluso si tiene una razón por la cual la observación no es relevante para el documento.

#### **8. Vuelva a plantear los Comentarios del Revisor o del Editor Cuando elabore la Respuesta**

La claridad de su parte es esencial para que el editor y revisores entiendan sus respuestas. No van a recordar el orden en que los comentarios fueron escritos, ni se acordarán de las palabras exactas que utilizaron. Haga su trabajo más fácil mediante la reformulación de un comentario del revisor, antes de describir cómo se ha modificado el documento. El número de página para el texto en cuestión no puede ser el mismo en la versión revisada como en la versión original, así que en cada una de las respuestas establezca el número de página y la línea de la versión revisada en que fueron hechas correcciones, cualquier texto nuevo que haya sido agregado, o cualquier texto que se trasladó en el documento. Copie el texto exacto desde la versión revisada en su respuesta. Además, en su versión revisada, no mantenga el texto original exacto o use el control de cambios para identificarlo.

Incluso si un revisor ha contado sus comentarios, no sólo escriba "Comentario 1" seguido de una respuesta. Repita los comentarios del revisor. Si los revisores tuvieron comentarios similares, no ponga un revisor con "ver respuesta de revisor 2", o sólo escriba "Comentario 1: Véase la respuesta al comentario 4 desde Revisor 1" Cada comentario desde cada revisor merece una respuesta individual, incluso si utiliza el mismo texto en sus respuestas por separado de los dos revisores. No se preocupe acerca de la cuenta de la longitud o la palabra de sus respuestas. El objetivo es ayudar al editor y los revisores a comprender fácilmente lo que hizo para mejorar el documento.

#### **9. Este Preparado Para Cortar el Texto**

Una revista es cara de producir, y el editor es responsable de equilibrar el contenido y los costos. Así que no se sorprenda si el editor le pide que se condense su documento eliminando algún texto, o incluso al eliminar una tabla o gráfico. Tome seriamente esta petición, y haga un esfuerzo honesto para ayudar al editor. Busque solapamiento en el contenido de la Introducción y el comienzo de la discusión. Leyendas de las figuras a menudo reiteran los detalles experimentales que ya se han presentado en los métodos. Las columnas de las tablas a veces pueden ser combinadas o eliminadas y reemplazadas con notas a pie. En el entorno actual de publicación electrónica, las cifras informativas pero no esenciales, tablas y datos experimentales se pueden suministrar en línea como en archivos adicionales. Sustituya palabras cortas por más largas. Considere el uso de la voz activa en lugar de la voz pasiva para guardar las palabras (por ejemplo, "el lisinopril

redujo la presión arterial” en lugar de “la presión arterial se redujo por el linisopril”).

#### **10. No Mande la Misma Versión a otro Diario**

Si su trabajo es rechazado por la primera revista a la que presentó su trabajo o si decide no enviar a una revisión posterior al diario, no envíe el documento a una segunda revista, sin tratar de abordar las preocupaciones de los revisores originales. Los comentarios del revisor a menudo ayudan a mejorar un documento, ¿por qué no aprovechar las ventajas del asesoramiento de los revisores si se puede mejorar el documento? Los mismos defectos que los revisores originales identificaron pueden ser detectados por los revisores nuevos. Peor aún, el segundo diario podría enviar el documento a los mismos revisores que lo vieron por primera vez. ¿Por qué correr riesgos en lugar de dedicar el tiempo necesario para revisar el documento antes de enviarlo a otra revista?

Hay un viejo dicho, “menos es más”. En muchos casos ese es un buen consejo para seguir, sin embargo, al responder los comentarios del revisor y editor, más es definitivamente mejor. Más tiempo es mejor que menos para recoger sus pensamientos antes de responder. Más análisis de la forma de los revisores y sugerencias del editor pueden mejorar el documento es mejor que menos. Mayor pensamiento en la meta final,

permite que un trabajo sea aceptado, puede ayudar a elegir sus batallas sabiamente. Más detalles en sus respuestas por escrito es mejor que menos detalles. Y quizás lo más importante de todos, expresando más humildad y gratitud es más sabio que lo que usted realmente quiera decir.

---

**Contribuciones autor:** *Cada autor confirmó que ha contribuido al contenido intelectual de este trabajo y ha cumplido con los siguientes tres requisitos: (a) contribuciones significativas a la concepción y el diseño, adquisición de datos, o análisis e interpretación de éstos, (b) la redacción o revisión del artículo en cuanto a su contenido intelectual, y (c) la aprobación final del artículo publicado.*

**Revelaciones de los autores de posibles conflictos de interés:** *A la presentación de manuscritos, todos los autores han elaborado la forma de deslinde de conflictos potenciales de de interés. Posibles conflictos de interés.*

**Empleo o de liderazgo:** T.A. Annesley, Clinical Chemistry, AACC.

**Papel del consultor o asesor:** No se declara.

**Propiedad:** No se declara.

**Honorarios:** No se declara.

**Fondos de la investigación:** No se declara.

**Testimonio de expertos:** No se declara.

**Papel del patrocinador:** Las organizaciones patrocinadoras no desempeñaron ningún papel en el diseño del estudio, la elección de los pacientes incluidos, la revisión e interpretación de datos, o la preparación o aprobación de manuscrito.
